# Supplementary material
Source: MDPI journal article supplement (https://www.mdpi.com/2079-9276/13/3/38)
Supplement: s1 [file s1]

## SUPPLEMENTARY MATERIAL

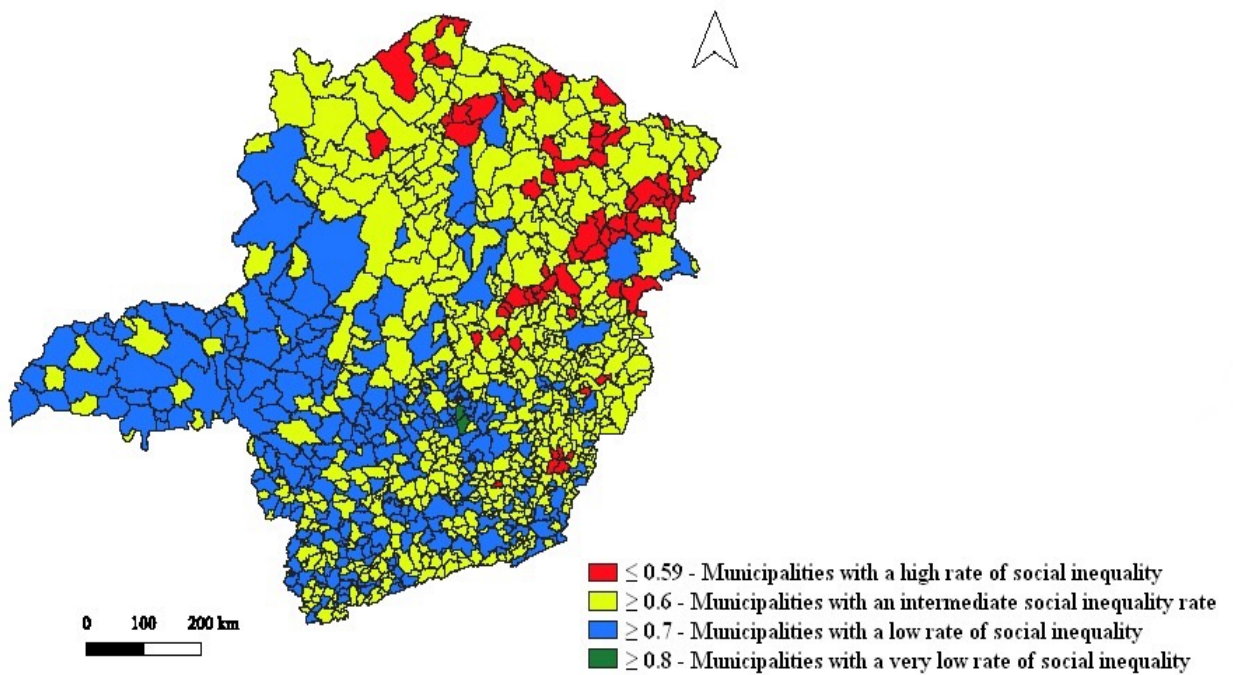

**Figure S1:** Human development index by municipality (IDH-M) in the State of Minas Gerais.

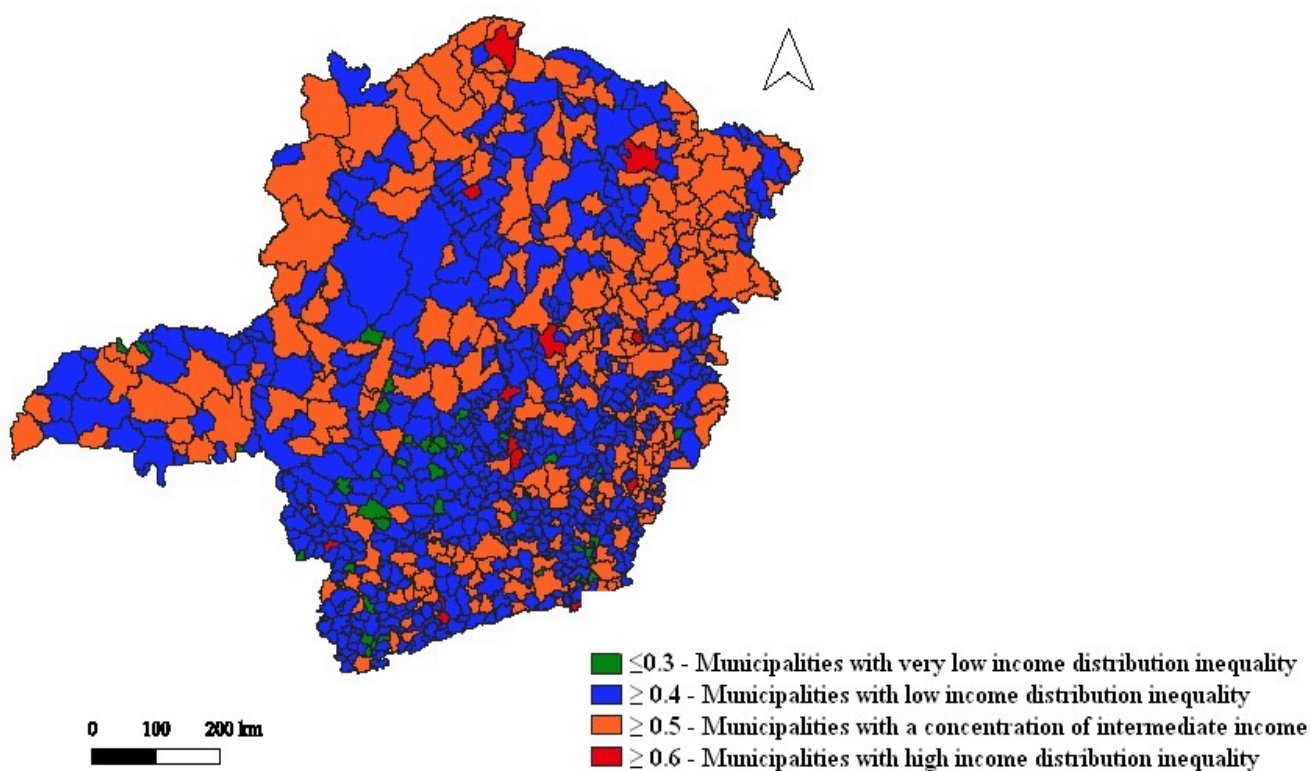

**Figure S2:** Distribution of Gini inequality index by municipalities in the state of Minas Gerais.

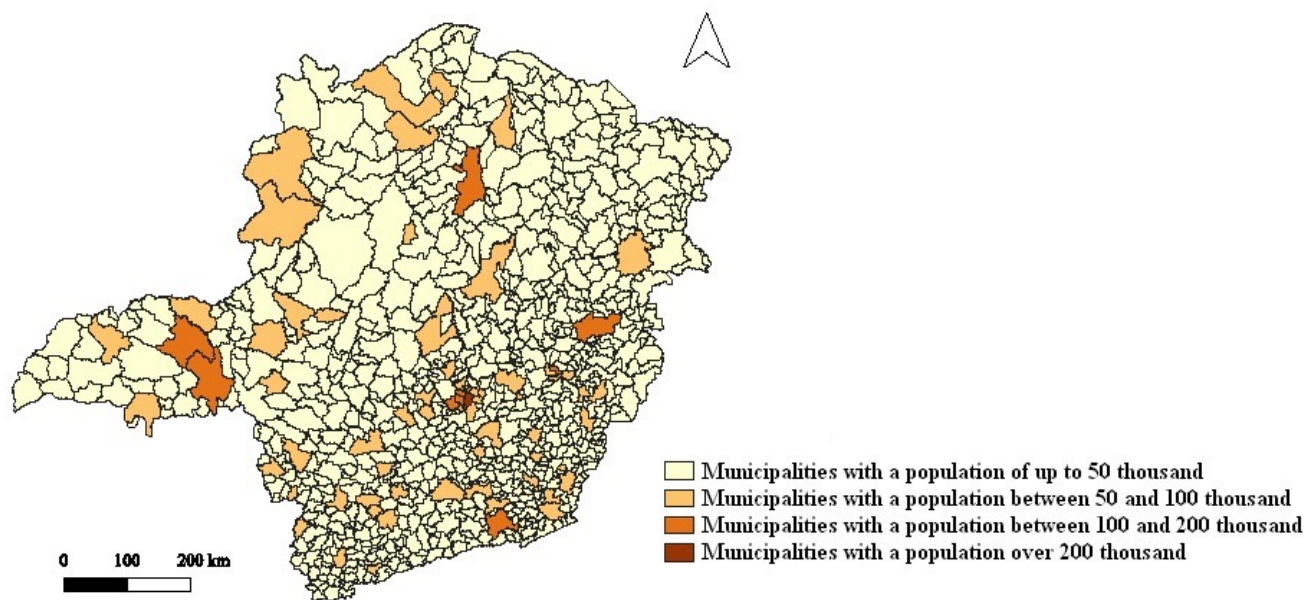

**Figure S3:** Population distribution by municipalities in the state of Minas Gerais.

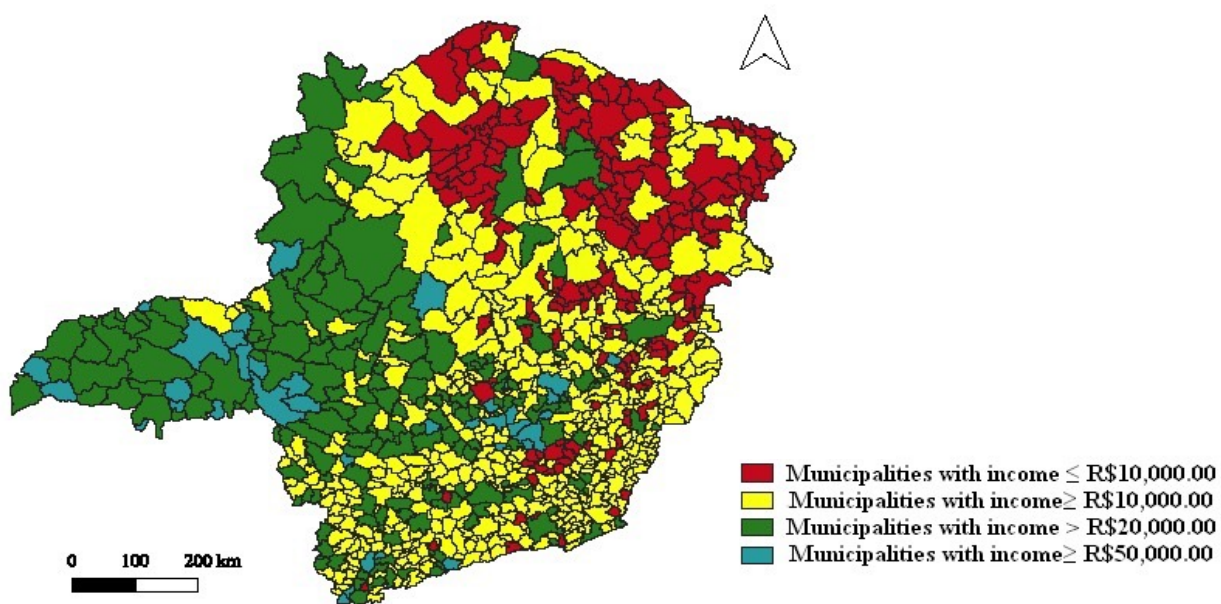

**Figure S4:** Distribution of per capita income by municipalities in the state of Minas.
